# Supplementary material
Source: MDPI journal article supplement (https://www.mdpi.com/2073-4395/14/1/130)
Supplement: s1 [file s1 › agronomy-2788598-supplementary.pdf]

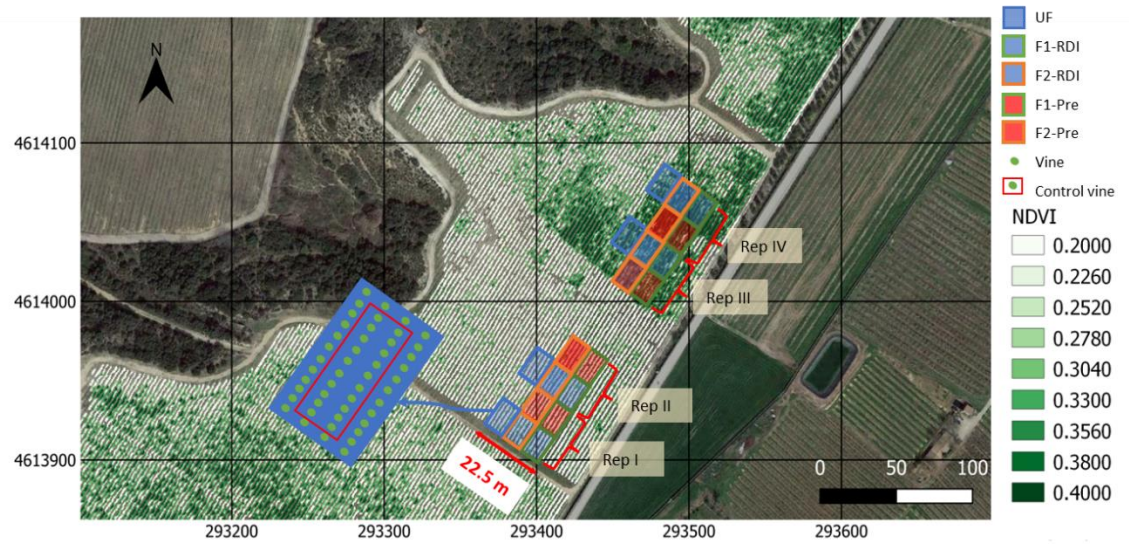

Figure S1 Map of the Experiment 1 (which included UF, F1-RDI and F2-RDI treatments) and the Experiment 2 (which included F1-RDI, F2-RDI, F1-Pre and F2-Pre treatments) with an Normalized Difference Vegetation Index (NDVI) map in the background performed in 2016 (one year before Experiment 1 started (2017)). Control vine corresponds to one vine in which measurements were taken. Other vines were used as borders between treatments. Rep means replicate.
